# Supplementary material
Source: ML conference proceedings conference paper supplement (https://aclanthology.org/2022.findings-acl.148)

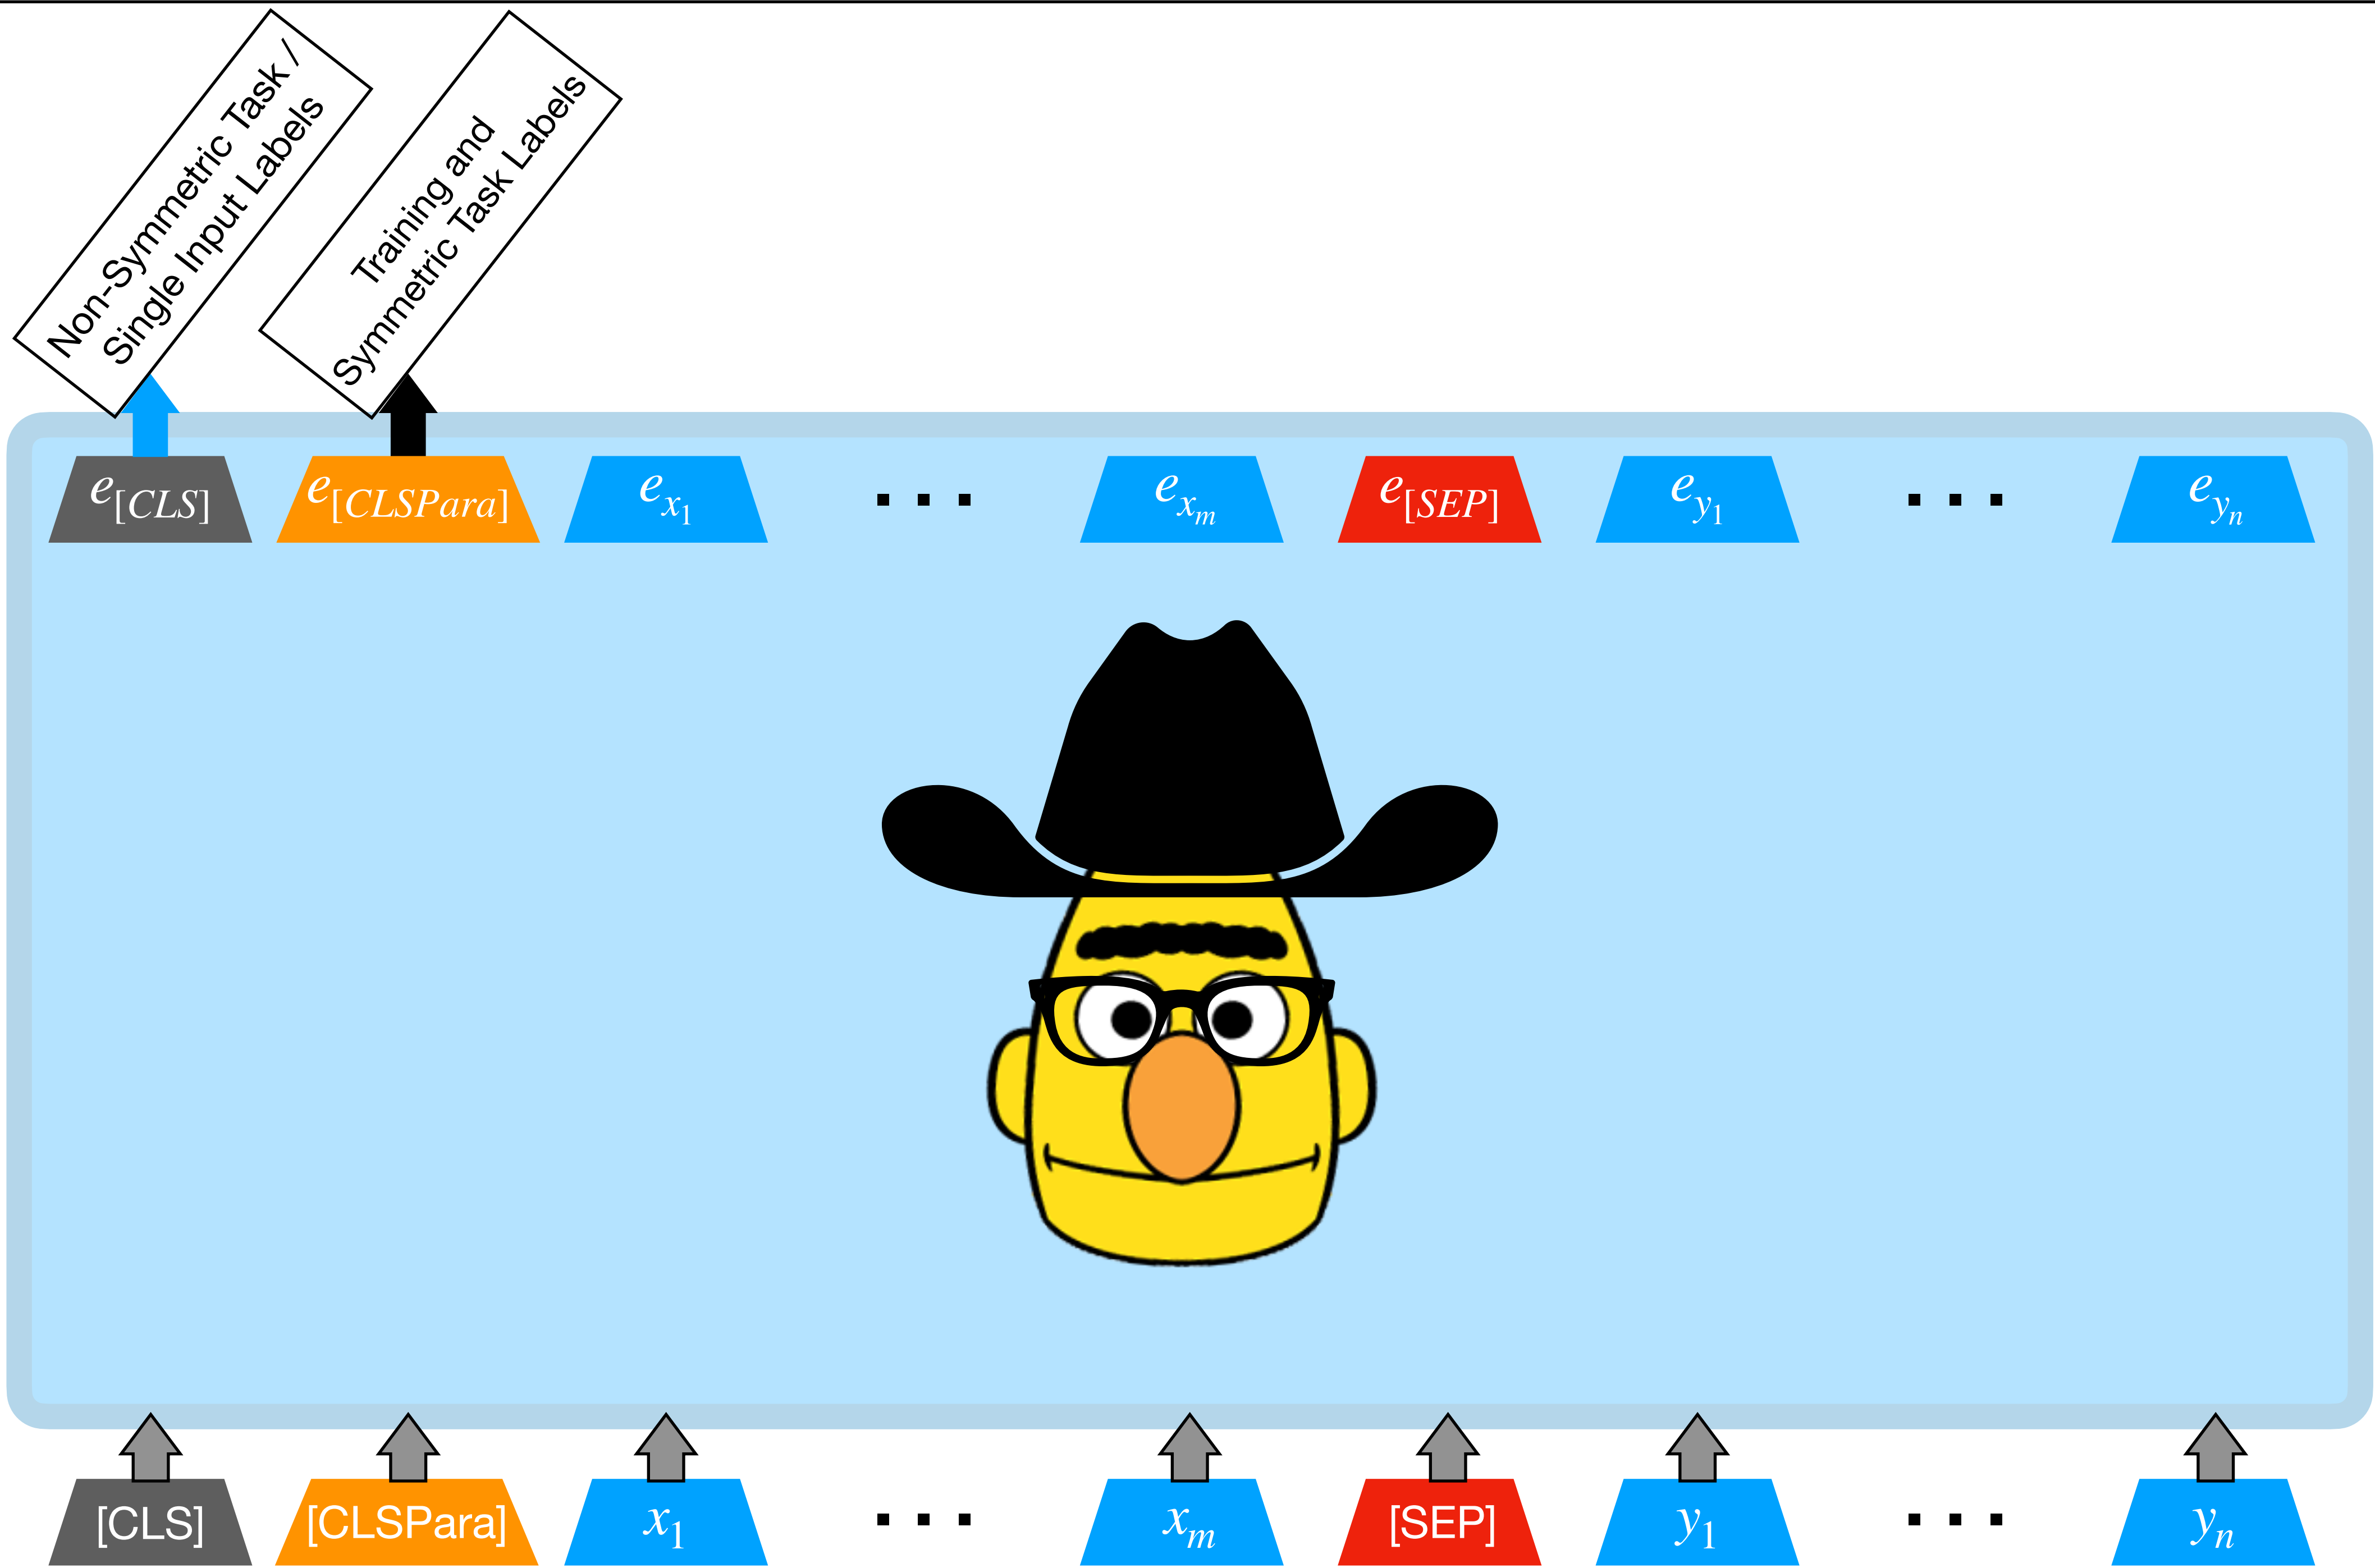

Supplement: software [file 2022.findings-acl.148.software.zip]
